# Supplementary material
Source: PubMed Central journal article supplement (PMC6696960)
Supplement: AEM.01033-19-s0001.pdf [file AEM.01033-19-s0001.pdf]

## Supplementary material

**Synergistic combination between LAE and light or mild heat with isobolograms.** The results in supplementary Fig. S.1 illustrate the isobole lines for achieving 2-log and 6-log inactivation of *Escherichia coli* using LAE and UV-A light as well as the synergistic antimicrobial combination applied in this study. The y-axis provides the LAE concentration alone required for inactivation of *E. coli* for a fixed time interval. Similarly, intersection of these lines on the x-axis, illustrate the fluence (energy per unit area) of UV-A light required for specific levels of inactivation of target bacteria using UV-A treatment alone. Fluence ( $\text{J}/\text{cm}^2$ ) was calculated as a function of time (seconds) multiply by average light intensity for four UV-A lamps ( $4.8 \pm 0.1 \text{ mW} \cdot \text{cm}^{-2}$ ). The results demonstrate that the combination of LAE and UV-A is synergistic compared to individual treatments. Furthermore, the synergistic combination requires half the concentration of LAE and 4-fold lower fluence level of UV-A light to achieve the same 6 log reduction of the inoculated *E.coli* using individual treatments.

The results in supplementary Fig. S.2 illustrate isobole lines for the inactivation of bacteria using heat or LAE. These isobole lines were generated by measuring the individual bactericidal activity of LAE as a function of concentration for a fixed time interval and for the total thermal energy input in the heating equipment. This energy (kJ) was calculated based on the product of the heat capacity of the water bath (1200 W) and treatment time (s) at 55 °C to inactivate bacteria. The results demonstrate that the combination of LAE and mild heat is synergistic compared to individual treatments. Furthermore, the synergistic combination requires 2.3-fold less concentration of LAE and over 27-fold less thermal energy required to achieve the same 5-log reduction of the inoculated *E.coli* using individual treatments.

**Oxidative stress generation from polymyxin B and LAE.** Both LAE and polymyxin B were analyzed for their bactericidal activity against *E. coli* O157:H7 at room temperature. As shown in

25 Fig. S.3a, LAE (15 ppm) demonstrated significant ( $P < 0.05$ ) bactericidal activity (1.5 log  
26 reduction) comparing to inoculum size during 30 min incubation, while polymyxin B did not.  
27 The LAE bactericidal activity was further neutralized ( $P < 0.05$ ) by glutathione, a common  
28 antioxidant: this result implied that the rapid LAE bactericidal activity was related to its  
29 oxidative stress genesis. To further confirm this hypothesis, LAE was tested again for its  
30 bactericidal activity at 4 °C, since metabolic activity of cells will be slowed down at low  
31 temperature, which resulted in attenuated oxidative damage. As shown in Fig. S.3b, no  
32 bactericidal activity was observed when *E. coli* cells were treated at 4 °C, indicated that LAE  
33 bactericidal activity was correlated with oxidative stress generation. Investigation of oxidative  
34 stress generation from polymyxin B was also confirmed by incubating *E. coli* O157:H7 with  
35 polymyxin B for 2 hours. As shown in Fig. S.3c, polymyxin B demonstrated significant ( $P <$   
36 0.05) bactericidal activity comparing to inoculum size, regardless of glutathione  
37 supplementation. In comparison, adding glutathione did not neutralize the bactericidal activity,  
38 indicating oxidative stress was not generated from polymyxin B.

39

40 **List of Figures**

41 **FIG S1** Synergistic combination between LAE concentration and UV-A light fluence.

42 **FIG S2** Synergistic combination between LAE concentration and mild heat.

43 **FIG S3** Understanding the relationship between bactericidal activity and oxidative stress. S.3a)  
44 Differences in the influence of glutathione on the antimicrobial activity of polymyxin B and  
45 LAE. The control included untreated cells. S.3b) Influence of temperature on antimicrobial  
46 activity on LAE compared to untreated cells. S.3c) Influence of extended incubation time and  
47 glutathione treatment on antimicrobial activity of polymyxin B. Controls included untreated  
48 cells.

49

50

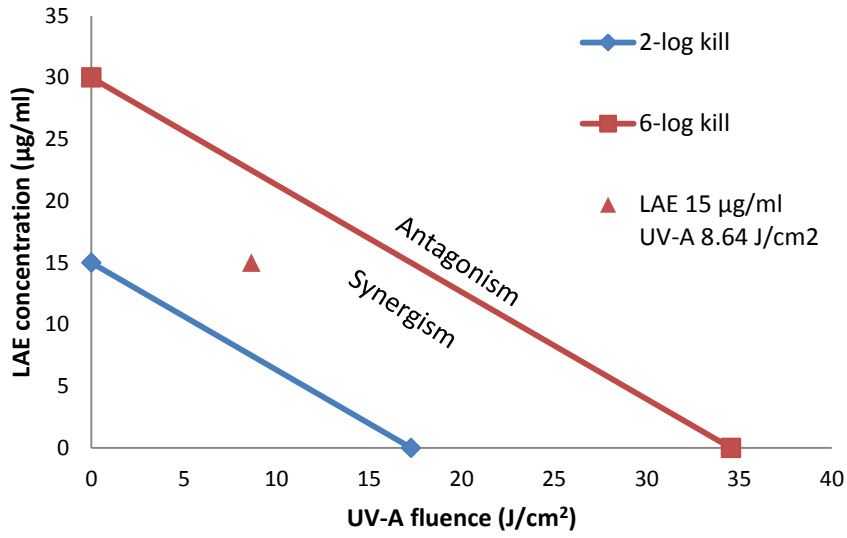

51

52 **FIG S1**

53

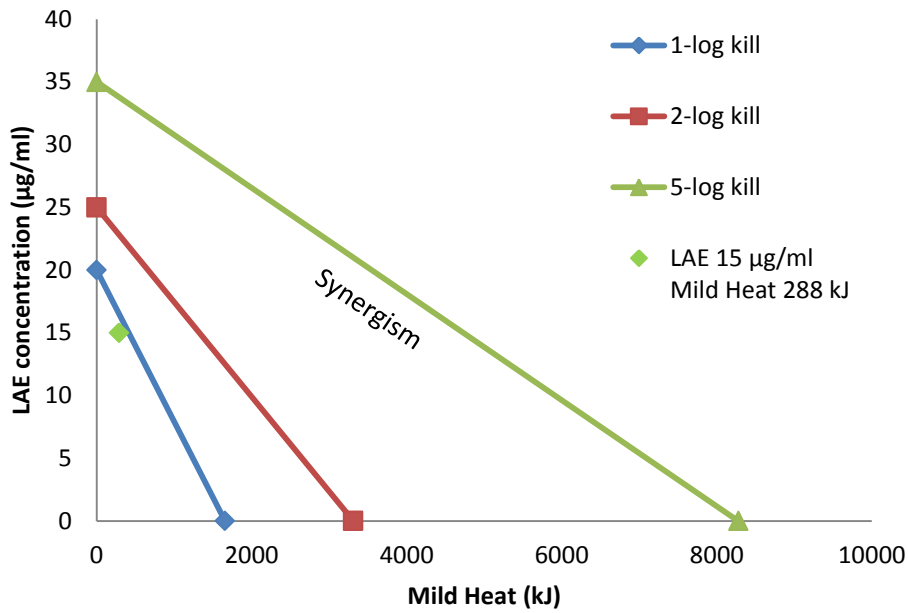

54

55 **FIG S2**

56

57

58

59 S.3a

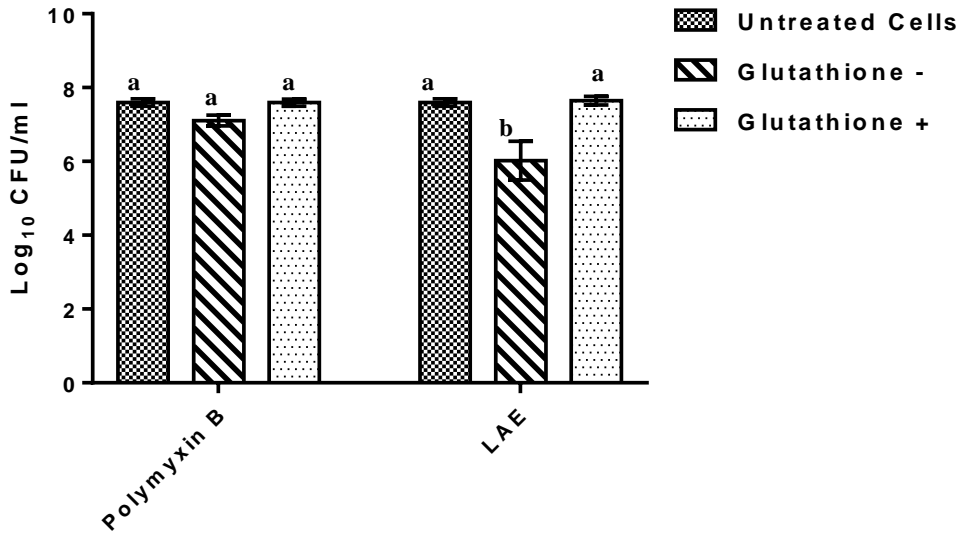

60

61 S.3b

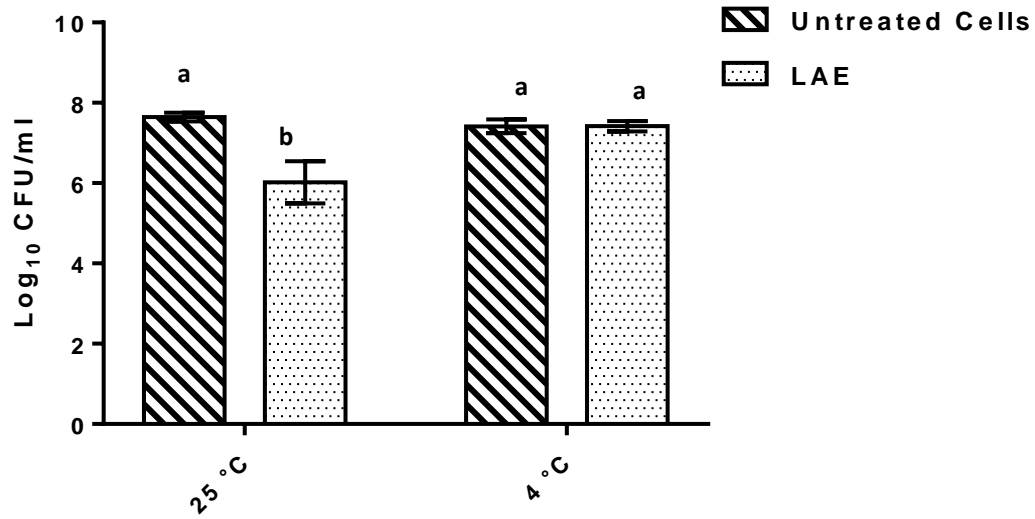

62

63

64

65

66

67

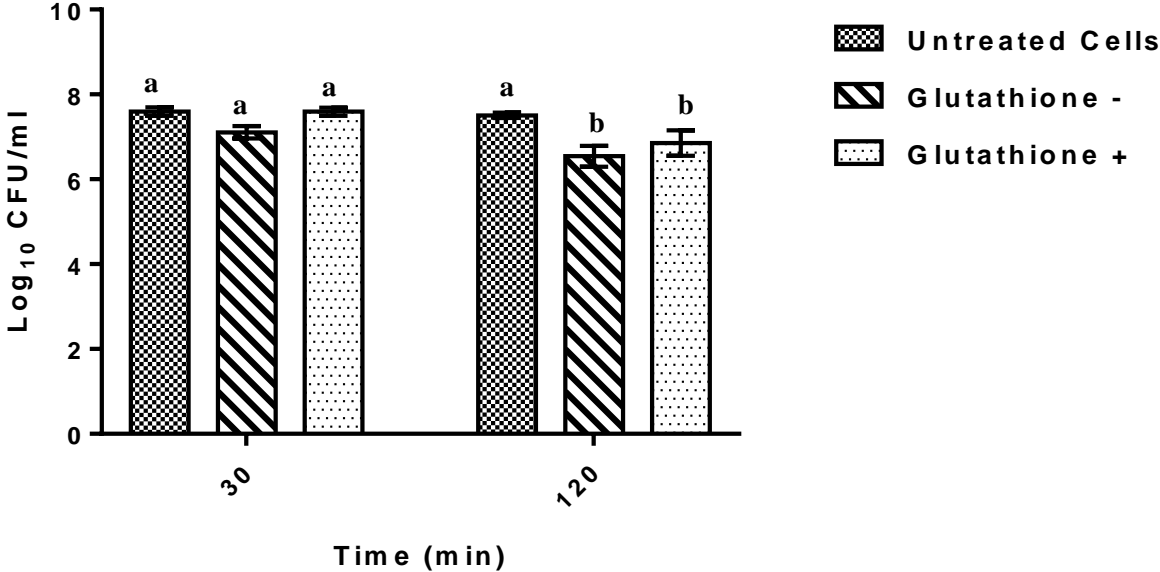

69

70 **FIG S3**

71
